# Supplementary material for: Perceptual load modulates contour integration in conscious and unconscious states
Source: PeerJ. 2019 Aug 22;7:e7550. doi: 10.7717/peerj.7550 (PMC6708573; doi:10.7717/peerj.7550)
Supplement: Supplemental Information 1 — There are four working sheets for Table 1, Figs. 4–6 and RTs in Phase II. [file peerj-07-7550-s001.xlsx]

## Sheet: Table one
		Questionaire								Questionaire
	Phase 1								Phase 3
participant	"S" Confidence	Frequency	Circles conf.	Frequency				participant	S Conf.	S Fre.	Circle Conf.	Circle Fre.
1	3	3	3	3				1	4	4	4	4
2	3	3	3	2				2	5	4	4	3
3	3	2	2	1				3	3	2	5	5
4	1	1	1	1				4	5	5	5	5
5	2	1	3	2				5	5	3	5	3
6	1	1	1	1				6	4	3	4	3
7	1	1	1	1				7	5	3	5	3
8	1	1	1	1				8	5	4	5	4
9	1	1	3	3				9	1	1	1	1
10	3	1	3	1				10	5	5	5	5
11	3	1	1	1				11	5	3	5	3
12	3	1						12	5	2	5	3
13	3	1	2	1.54545				13	5	4	5	5
14	1	1	0.301511	0.247299				14	5	4	5	4
15	3	2						15	4	2	5	2
AVG	2.13333	1.4						AVG	4.4	3.26667	4.53333	3.53333
SD	0.255728	0.190238						SD	0.289499	0.300264	0.273716	0.306542

## Sheet: Fighure 4
										Phase Ⅰ																			Phase Ⅰ
Phase 1	circle				S					Low load				A	low load for circle contour							B	low load for S contour						High load				C	High load for circle contour								D	High load for S contour
	low load		high load		low load		high load							Salient O			Non O					Salient S			Non S								Salient O			Non O					Salient S			Non S
	salient	non-salient	salient	non-salient	salient	non-salient	salient	non-salient					Participant	Cued	Uncued		Cued	UnCued			Participant	Cued	Uncued		Cued	Uncued						Participant	Cued	Uncued		Cued	UnCued			Participant	Cued	Uncued		Cued	UnCued
cuing effect	0.126986	-0.0460449	0.0548652	-0.0158016	-0.0256292	0.0312116	-0.0734554	-0.0617094					2	0.963181	0.778816	0.184365	0.801262	0.942442	-0.14118		1	0.58772	0.733243	-0.145523	0.61939	0.795987	-0.176597					2	1.0899	1.20272	-0.112826	1.10224	1.21088	-0.108643		1	1.06382	1.15927	-0.0954467	1.06224	1.36217	-0.29993
standard error	0.0449899	0.0519242	0.0314719	0.0489814	0.036051	0.0368633	0.0287131	0.0441353					3	0.739798	0.925534	-0.185736	0.781211	0.781229	-1.71692e-05		2	0.966449	0.855781	0.110667	0.731312	0.824443	-0.0931309					3	0.48861	0.827607	-0.338997	0.536626	0.550455	-0.0138282		2	1.25509	1.0312	0.223889	1.15902	1.19706	-0.0380335
													4	0.313953	0.300687	0.0132657	0.44674	0.455649	-0.0089098		3	0.717523	0.92317	-0.205647	0.939926	0.751385	0.18854					4	0.676635	0.90443	-0.227796	0.59459	0.561891	0.0326989		3	0.600871	0.660797	-0.0599256	0.600021	0.491141	0.108879
													5	0.870513	0.77354	0.0969734	0.734601	0.78303	-0.0484283		5	1.02729	0.757858	0.269434	0.723228	1.05289	-0.329658					5	1.054	1.10684	-0.0528452	1.26412	0.973018	0.291105		5	1.09601	1.41206	-0.316053	1.0463	0.966545	0.0797513
Phase 3	circle				S								6	0.818122	0.915285	-0.0971628	0.837054	0.720211	0.116843		6	0.822978	0.697759	0.125219	0.743107	0.759089	-0.0159826					6	0.756816	0.75675	6.61363e-05	0.694738	0.858154	-0.163416		6	0.712542	0.740987	-0.0284454	0.827581	0.694914	0.132667
	low load		high load		low load		high load						8	1.32956	1.19382	0.135739	1.40826	1.16369	0.244568		8	1.42974	1.46861	-0.0388626	1.27464	1.30981	-0.0351682					8	1.23193	1.12267	0.10926	1.28367	1.21018	0.0734816		8	1.33406	1.28193	0.0521333	1.14172	1.18756	-0.0458412
	salient	non-salient	salient	non-salient	salient	non-salient	salient	non-salient					9	0.661518	0.579668	0.0818499	0.592232	0.604396	-0.0121634		9	0.676057	0.839507	-0.16345	0.678785	0.709664	-0.0308788					9	0.696563	0.579381	0.117182	0.656253	0.682413	-0.0261603		9	0.643428	0.687963	-0.0445358	0.872317	0.726984	0.145333
cuing effect	0.107579	-0.018366	-0.0268221	0.0252193	-0.112998	0.0254012	0.049379	-0.0465747					10	0.740125	0.77948	-0.0393545	0.736622	0.786747	-0.0501253		10	0.759938	0.892609	-0.132672	0.734377	0.64691	0.087467					10	0.8785	0.769041	0.109459	0.830259	0.737888	0.092371		10	0.808888	0.638207	0.170681	0.785398	0.867184	-0.0817858
standard error	0.0422382	0.0336719	0.0356564	0.0500804	0.0402405	0.0375072	0.0410188	0.0396525					12	1.29526	1.11744	0.177821	1.13051	1.09143	0.039071		12	1.19379	1.24985	-0.0560533	1.55582	1.19627	0.35955					12	1.28684	1.36486	-0.0780126	1.23762	1.49614	-0.258519		12	1.31869	1.23489	0.0838006	1.31553	1.25827	0.0572505
													16	0.918284	0.964336	-0.0460522	1.01289	0.700237	0.312653		13	0.703355	0.692225	0.0111305	0.726204	0.663632	0.0625722					16	0.851835	0.63026	0.221575	0.764361	0.77415	-0.00978968		13	1.00342	0.98399	0.0194316	1.04711	0.888883	0.158222
													18	0.799198	0.743451	0.0557469	0.661442	0.698708	-0.0372666		14	0.868587	0.896478	-0.0278915	0.721489	0.782618	-0.0611293					18	0.905324	1.08819	-0.182864	1.19503	1.03856	0.15647		14	1.09894	1.19516	-0.0962111	1.09772	1.05264	0.0450843
													AVG	0.859047	0.824733	0.0343141	0.831165	0.793434	0.0377313		16	1.01712	0.88715	0.129971	0.94743	0.98505	-0.03762					AVG	0.901541	0.941159		0.923592	0.917613			16	0.77398	0.818488	-0.044508	0.933272	0.824408	0.108865
													SD	0.26899	0.235066	0.112038	0.254243	0.195694	0.0585492		17	0.973286	1.03103	-0.0577394	0.7587	0.922338	-0.163639					SD	0.234212	0.240334		0.280538	0.285574			17	0.721958	0.919634	-0.197677	0.899883	1.1821	-0.282212
													SE	0.0850622	0.0743344	0.0354296	0.0803986	0.0618837	0.0185149		18	0.72318	0.765221	-0.0420416	0.652891	0.754925	-0.102034					SE	0.0740642	0.0760002		0.088714	0.0903065			18	0.986074	1.05329	-0.0672113	0.974837	1.11459	-0.139756
																					19	0.557832	0.604066	-0.0462343	0.640883	0.565649	0.0752336													19	0.761313	0.838388	-0.0770756	0.708048	0.810331	-0.102283
																					AVG	0.868324	0.886303		0.829879	0.848044														AVG	0.945273	0.977083		0.964732	0.974985
																					SD	0.228927	0.216682		0.25169	0.201258														SD	0.237706	0.236647		0.181929	0.236082
																					SE	0.0611834	0.0579108		0.067267	0.0537886														SE	0.0635295	0.0632465		0.0486225	0.0630957

## Sheet: Figure 5
Phase Ⅲ																			Phase Ⅲ
Low load				A	low load for circle contour								B	low load for S contour					High load				C	High load for circle contour							D	High load for S contour
				Salient O			Non O					Salient S			Non S							Salient O			Non O					Salient S			Non S
			Participant	Cued	Uncued		Cued	UnCued			Participant	Cued	Uncued		Cued	UnCued					Participant	Cued	Uncued		Cued	UnCued			Participant	Cued	Uncued		Cued	UnCued
			1	0.567692	0.520985	0.0467072	0.647596	0.519469	0.128126		1	0.554394	0.529695	0.0247	0.519837	0.638256	-0.118418				1	0.837621	0.685232	0.152389	0.756165	0.820334	-0.0641691		1	0.67283	0.815638	-0.142808	0.787261	0.748544	0.0387165
			2	0.838633	0.890027	-0.0513938	0.740083	0.893426	-0.153343		2	1.02109	0.806085	0.215006	0.885074	0.66246	0.222614				2	1.0292	0.910704	0.118499	0.798744	0.89859	-0.099846		2	0.988293	0.880667	0.107626	0.890387	1.17404	-0.283655
			3	0.98349	0.975504	0.00798605	1.07482	1.01296	0.0618602		3	1.08702	0.973187	0.113837	0.946601	0.977136	-0.0305352				3	1.34117	1.35892	-0.0177485	1.02963	1.34959	-0.319959		3	1.17888	1.38012	-0.201245	1.44295	1.2938	0.149144
			4	0.5637	0.406151	0.157549	0.427108	0.434817	-0.00770953		4	0.202821	0.272994	-0.0701735	0.277107	0.243899	0.033208				4	0.442734	0.552489	-0.109756	0.323471	0.58575	-0.262279		4	0.352243	0.240983	0.11126	NaN	0.492067	#VALUE!
			5	0.682419	0.834484	-0.152065	0.702549	0.710661	-0.00811207		5	0.883016	0.641648	0.241368	0.763336	0.83853	-0.0751948				5	0.838781	0.80243	0.0363516	0.853949	0.870976	-0.0170266		5	0.760096	0.838186	-0.0780894	0.870883	0.722164	0.148718
			6	0.60999	0.459759	0.150231	0.555098	0.570918	-0.01582		6	0.552838	0.520747	0.0320904	0.544794	0.505306	0.0394877				6	0.594921	0.547894	0.047027	0.45029	0.509295	-0.0590052		6	0.568471	0.455754	0.112717	0.502418	0.520919	-0.0185004
			7	0.971163	0.758768	0.212395	0.770311	0.958829	-0.188518		7	0.923984	0.955874	-0.0318898	0.943153	0.860746	0.0824067				7	1.10865	1.0657	0.0429486	1.11526	1.07646	0.0388065		7	1.05238	1.01761	0.0347712	0.942537	1.07865	-0.136115
			8	1.09307	1.32777	-0.234705	1.2968	1.06761	0.22919		8	1.13684	1.21772	-0.0808844	1.1597	1.11595	0.0437506				8	1.19994	1.18229	0.0176524	1.24939	1.3377	-0.0883065		8	1.17436	1.16123	0.0131294	1.19874	1.30232	-0.103581
			10	0.627651	0.61937	0.00828097	0.638914	0.632608	0.00630538		10	0.591594	0.628825	-0.0372316	0.570428	0.62735	-0.0569218				10	0.68094	0.707459	-0.0265191	0.646733	0.71926	-0.0725263		10	0.710841	0.583047	0.127793	0.732175	0.771793	-0.0396182
			11	0.625317	0.714373	-0.0890558	0.496416	0.520887	-0.0244708		11	0.491006	0.696183	-0.205176	0.49943	0.841659	-0.342229				11	0.614511	0.755823	-0.141312	0.707003	0.644618	0.0623854		11	0.722845	0.59096	0.131885	0.692926	0.626182	0.0667435
			12	0.95024	0.900015	0.050225	0.905886	0.839208	0.066678		12	0.974021	0.909557	0.064463	0.83347	1.0377	-0.204235				12	1.27843	1.28964	-0.011204	1.25416	1.25422	-5.82497e-05		12	1.30482	1.31907	-0.0142576	1.07712	1.36993	-0.292818
			13	0.650004	0.69835	-0.0483462	0.595142	0.68672	-0.0915783		13	0.656467	0.687181	-0.0307134	0.630853	0.674538	-0.0436852				13	0.791742	0.846259	-0.0545169	0.840659	0.767729	0.0729303		13	0.772071	0.748142	0.0239294	0.731501	0.845235	-0.113734
			14	0.825819	0.797075	0.0287442	0.784508	0.648025	0.136483		14	0.806571	0.787338	0.0192336	0.809403	0.670445	0.138958				14	1.30366	0.984223	0.319437	0.872463	0.682768	0.189695		14	0.856526	0.670799	0.185727	0.776934	0.915178	-0.138244
			18	0.640334	0.601012	0.0393216	0.775226	0.647161	0.128066		18	0.642817	0.62546	0.0173565	0.665656	0.622123	0.0435326				18	0.693558	0.675798	0.0177599	0.65284	0.656233	-0.00339251		18	0.684726	0.831156	-0.14643	0.679684	0.719289	-0.0396048
			19	0.663579	0.642658	0.0209209	0.62954	0.663783	-0.0342426		19	0.630307	0.648469	-0.018162	0.744243	0.579166	0.165077				19	0.671254	0.661222	0.0100313	0.695738	0.717603	-0.0218645		19	0.686466	0.686729	-0.000262552	0.668252	0.73838	-0.070128
			AVG	0.752873	0.743087		0.736	0.720472			AVG	0.743652	0.726731		0.719539	0.726351					AVG	0.895141	0.868405		0.816434	0.859408			AVG	0.83239	0.814674		0.856697	0.8879
			SD	0.168686	0.222881		0.215766	0.18509			SD	0.250431	0.219172		0.215082	0.215587					SD	0.28244	0.249027		0.255873	0.263244			SD	0.258825	0.299306		0.235965	0.278172
			SE	0.0450832	0.0595673		0.0576658	0.0494674			SE	0.0669305	0.0585762		0.0574831	0.0576181					SE	0.0754852	0.0665553		0.068385	0.070355			SE	0.0691739	0.0799929		0.065445	0.0743447

## Sheet: Figure 6
			Data for 19 participants						ACC Data for 15 participants
										Figure 6
	Participant	Salient O	Nons O	Salient S	Nons S					circle contour		S contour
	1	1	0.527778	0.972222	0.666667				Participant	salient	non-salient	salient	non-salient
	2	0.888889	0.583333	0.888889	0.388889				1	1	0.527778	0.972222	0.666667
	3	0.944444	0.444444	0.916667	0.583333				2	0.888889	0.583333	0.888889	0.388889
	4	0.944444	0.75	0.972222	0.527778				3	0.944444	0.444444	0.916667	0.583333
	5	1	0.583333	1	0.527778				4	0.944444	0.75	0.972222	0.527778
	6	1	0.611111	0.944444	0.416667				5	1	0.583333	1	0.527778
	7	1	0.5	0.972222	0.333333				6	1	0.611111	0.944444	0.416667
	8	1	0.611111	1	0.416667				7	1	0.5	0.972222	0.333333
	9	0.972222	0.75	0.972222	0.444444				8	1	0.611111	1	0.416667
	10	1	0.527778	0.944444	0.722222				10	1	0.527778	0.944444	0.722222
	11	0.916667	0.611111	0.861111	0.638889				11	0.916667	0.611111	0.861111	0.638889
	12	0.972222	0.638889	1	0.527778				12	0.972222	0.638889	1	0.527778
	13	1	0.527778	0.972222	0.527778				13	1	0.527778	0.972222	0.527778
	14	0.944444	0.555556	1	0.444444				14	0.944444	0.555556	1	0.444444
	15	0.944444	0.666667	0.972222	0.472222				18	0.944444	0.555556	0.944444	0.527778
	16	0.944444	0.5	0.944444	0.555556				19	1	0.638889	1	0.583333
	17	0.972222	0.583333	1	0.694444				AVG	0.97037	0.577778	0.959259	0.522222
	18	0.944444	0.555556	0.944444	0.527778				SD	0.0358131	0.0696848	0.0416564	0.104527
	19	1	0.638889	1	0.583333				SE	0.00957146	0.018624	0.0111331	0.0279361

## Sheet: RT for Phase II
	RT（after excluding outliers）				Eliminaltion rate
participant	Salient O	Nons O	Salient S	Nons S	Salient O	Nons O	Salient S	Nons S	AVG
1	0.41103	0.662657	0.435806	0.617776	0	0.0277778	0	0.0277778	0.0138889
2	0.39403	0.43039	0.335631	0.499965	0.0555556	0	0.0555556	0.0833333	0.0486111
3	0.521485	0.927198	0.638504	0.804768	0	0.0555556	0.0277778	0.138889	0.0555556
4	0.538737	0.64471	0.596502	0.638611	0.0277778	0.0555556	0	0.111111	0.0486111
5	0.379548	0.84046	0.51474	0.837174	0	0	0	0.0833333	0.0208333
6	0.47137	0.525585	0.4554	0.471898	0.0555556	0	0.0555556	0.0555556	0.0416667
7	0.466883	1.0869	0.450255	1.04655	0	0	0	0.0277778	0.00694444
8	0.496657	0.694594	0.509369	0.741722	0	0.0833333	0	0.111111	0.0486111
10	0.388591	0.595066	0.425934	0.62013	0.0277778	0.111111	0	0.0555556	0.0486111
11	0.448356	0.483181	0.419346	0.49341	0	0.111111	0	0.138889	0.0625
12	0.319709	0.564849	0.360799	0.623593	0	0.194444	0	0	0.0486111
13	0.500396	0.778193	0.493558	0.852553	0	0.111111	0	0.0833333	0.0486111
14	0.378059	0.637317	0.347326	0.660238	0.0555556	0.0277778	0	0.0555556	0.0347222
18	0.630529	0.878249	0.712388	0.996426	0	0.0555556	0.0277778	0.111111	0.0486111
19	0.316119	0.464143	0.326073	0.555326	0	0.0277778	0	0.166667	0.0486111
					0.0148148	0.0574074	0.0111111	0.0833333	0.0416667
